# Supplementary material for: MYC targeting by OMO-103 in solid tumors: a phase 1 trial
Source: PubMed Central journal article supplement (PMC10957469; doi:10.1038/s41591-024-02805-1), 2024-02-06
Supplement: 41591_2024_2805_MOESM2_ESM.pdf [file 41591_2024_2805_MOESM2_ESM.pdf]

**Supplementary Table 2: SD patients display a specific pharmacodynamic signature.**

Characteristics of the patients used for the pharmacodynamic signature are shown. 102-001 displayed the pharmacodynamic signature at C6 instead of C3. PDAC: pancreatic ductal adenocarcinoma; NSCLC: non-small cell lung cancer; CRC: colorectal cancer.

| Patient ID | Cohort | Dose (mg/kg) | Tumor type     | Timepoint | Response RECIST 1.1 | Pharmacodynamic signature |
|------------|--------|--------------|----------------|-----------|---------------------|---------------------------|
| 102-001    | 3      | 2,88         | Salivary Gland | C6*       | SD                  | YES                       |
| 101-002    | 3      | 2,88         | PDAC           | C3        | SD                  | YES                       |
| 103-003    | 4      | 4,32         | Sarcoma        | C3        | SD                  | YES                       |
| 101-005    | 5      | 6,48         | NSCLC          | C3        | SD                  | YES                       |
| 101-007    | 5      | 6,48         | CRC            | C3        | SD                  | YES                       |
| 101-008    | 6      | 6,48         | CRC            | C3        | SD                  | YES                       |
| 101-009    | 5      | 9,72         | CRC            | C3        | SD                  | YES                       |
| 103-002    | 3      | 2,88         | Mesothelioma   | C3        | PD                  | NO                        |
| 101-004    | 4      | 4,32         | CRC            | C3        | PD                  | NO                        |
| 102-003    | 4      | 4,32         | PDAC           | C3        | PD                  | NO                        |
| 101-006    | 5      | 6,48         | CRC            | C3        | PD                  | NO                        |
